# Supplementary material
Source: Springer Nature journal article supplement (https://www.springermedizin.de/resource/supplementary/12916_2014_990_MOESM2_ESM.pdf/9598770)

Incidence rate ratio

1,60  
1,40  
1,20  
1,00  
0,80  
0,60

daycare in 1st year

age 0-2 months

age 3-5 months

age 6-12 months

0-1 year

daycare in 1st year

age 0-2 months

age 3-5 months

age 6-12 months

1-2 year

daycare in 1st year

age 0-2 months

age 3-5 months

age 6-12 months

2-3 year

daycare in 1st year

age 0-2 months

age 3-5 months

age 6-12 months

3-4 year

daycare in 1st year

age 0-2 months

age 3-5 months

age 6-12 months

4-5 year

daycare in 1st year

age 0-2 months

age 3-5 months

age 6-12 months

5-6 year

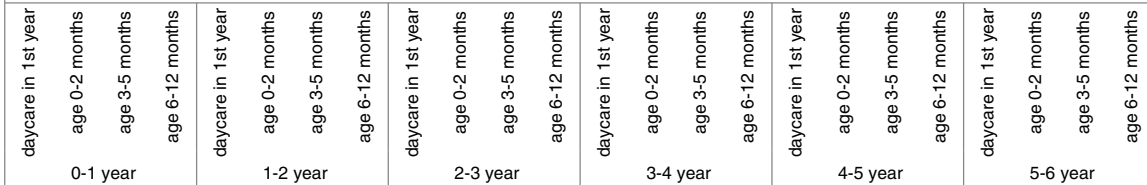

Supplement: MOESM2 [file 9598770]
